# Supplementary material for: Brain hubs in lesion models: Predicting functional network topology with lesion patterns in patients
Source: PubMed Central journal article supplement (PMC5738424; doi:10.1038/s41598-017-17886-x), 2017-12-20
Supplement: 41598_2017_17886_MOESM1_ESM.pdf [file 41598_2017_17886_MOESM1_ESM.pdf]

**Brain hubs in lesion models:**  
**Predicting functional network topology with lesion patterns in**  
**patients**

Binke Yuan, Yuxing Fang, Zaizhu Han, Luping Song, Yong He & Yanchao Bi

**Supplementary Figures**

**Figure S1. Overall lesion distribution of the 96 patients: number of patients having lesion in each voxel (a) or of the 180 regions (b).**

**Figure S2. The scatter plots of actual network topological properties versus predicted values using the three lesion models and the corresponding linear regression line.** The  $r$  values were the Pearson correlation coefficients between the predicted values and the actual values, and the  $P$  values (one-tailed) were calculated based on 1000 permutation tests.

**Figure S3. Module organization, nodal WMD and PC of the averaged whole-brain healthy functional network ( $N = 144$ ).** (a and b) The module assignments and modularity  $Q$  values in sparsity range 0.05–0.2 (step 0.01). Four modules, the visual network, frontal-parietal network, default mode network and somatosensory network, were consistently identified. A representative sparsity threshold,  $s = 0.15$  was selected to calculate the thresholded binary functional network (c), the module organization (d,  $Q = 0.47$ ,  $Z\text{-score} = 63.76$ ), PC (e) and WMD (f). (g) Scatter plot showing node roles based on nodal PC and WMD .

**Figure S4. Nodal gE of the averaged whole-brain healthy functional network ( $N = 144$ ).**

**Figure S5. Results of lesion hubs when network metrics were calculated using AUC in sparsity thresholds 0.13–0.47 (step 0.01).**

**Figure S6. Results of lesion hubs when network metrics were calculated based on censored data.** One subject who had fewer than 50 volumes after scrubbing was removed.

**Figure S7. Results of lesion hubs when lesion pattern and network metrics were calculated using the Brainnetome Atlas.**

**Figure S8. Results of lesion hubs when lesion pattern and network metrics were calculated using the Craddock 1000 Atlas.** Note that because of the high non-independence among features when using the Craddock atlas with 1000 partitions, we focused on the lesion-hub detection results with the Craddock 200 atlas and the Brainnetome atlas.

**Figure S9. The lesion overlap of 11 patients with focal brain lesion in the left insula (a lesion hub with “integration” lesion effect identified in lesion models).**

**Figure S10. The changing directions of network topology after focal brain lesion in the left insula.** Two-sample t-tests between the 11 patients and 36 matched controls were performed and confounding variables (age, sex and education) were considered. The network locE and gE were normalized by 100 degree-matched random networks. The imbedded scatter plots show the distributions (mean and standard deviations of each group and the  $t$  and  $p$  values of Two-sample t-test) of network topological properties in  $s = 0.15$ .

**Figure S11. The averaged BOLD tSNR (temporal signal noise ratio) of the 36 controls.** The tSNR for each node was estimated using the normalized data:

$tSNR = S_{mean} / \delta_{mean}$ , where the  $S_{mean}$  and  $\delta_{mean}$  are the mean intensity of the averaged BOLD signals and the standard deviation of the averaged BOLD signals of

a node, respectively. (a) The mean tSNR averaged across the 36 controls. (b) The histogram of the averaged tSNR. (c) Most nodes satisfy the criteria for signal quality (mean tSNR > 80).

**Figure S12. The relationship between patient's age and the network topological properties ( $s = 0.15$ ).**

## **Supplementary Tables**

**Table S1.** Detailed demographic and etiological characteristics of the 96 patients.

**Table S2.** Pearson's correlation coefficient between topological metrics ( $s = 0.15$ ) and potential confounding variables for all subjects.

**Table S3.** SVR prediction accuracies for the validation analyses.

**Table S4.** Participants' demographics of the 11 patients with focal brain lesions in the left insula and 36 matched controls.

## **Supplementary Methods**

- Network attributes calculation
- Calculation of nodal centrality measures in the healthy functional network
- Validation analyses

## Supplementary Figures

Figure S1

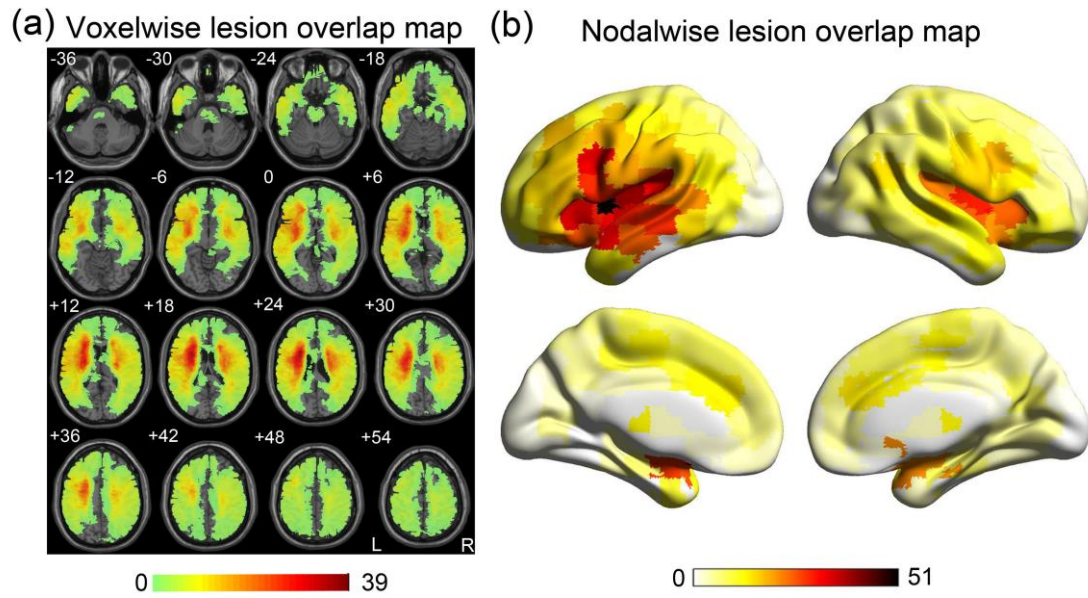

**Figure S1. Overall lesion distribution of the 96 patients: number of patients having lesion in each voxel (a) or of the 180 regions (b).**

**Figure S2**

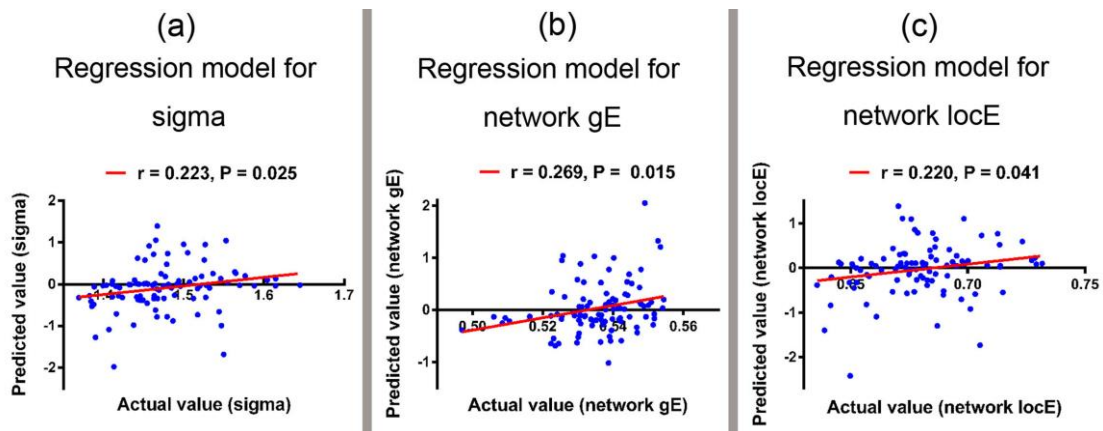

**Figure S2. The scatter plots of actual network topological properties versus predicted values using the three lesion models and the corresponding linear regression line.** The  $r$  values were the Pearson correlation coefficients between the predicted values and the actual values, and the  $P$  values (one-tailed) were calculated based on 1000 permutation tests.

**Figure S3**

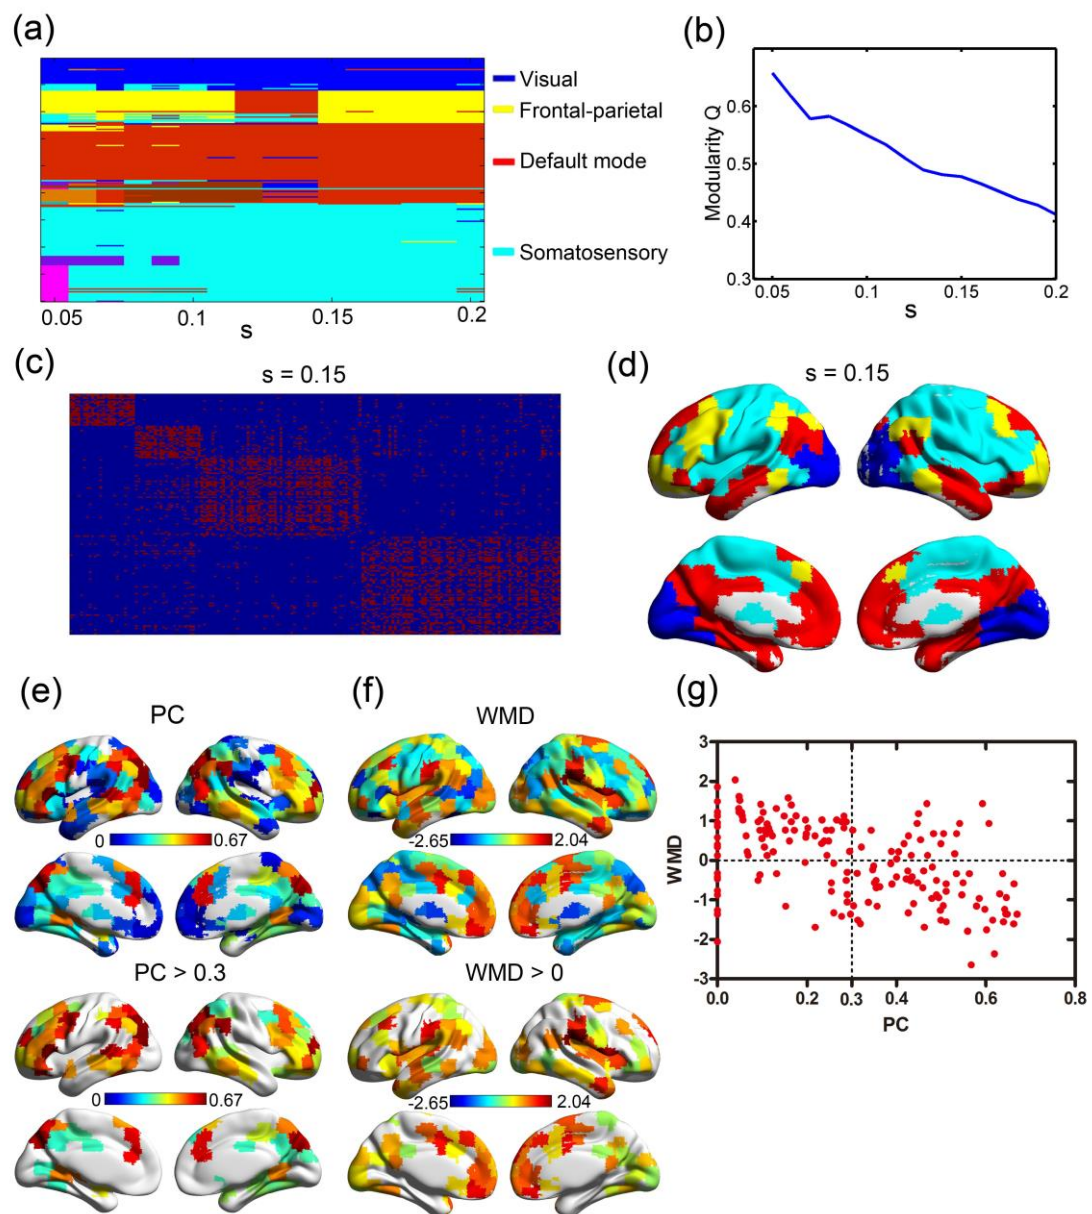

**Figure S3. Module organization, nodal WMD and PC of the averaged whole-brain healthy functional network ( $N = 144$ ).** (a and b) The module assignments and modularity  $Q$  values in sparsity range 0.05–0.2 (step 0.01). Four modules, the visual network, frontal-parietal network, default mode network and somatosensory network, were consistently identified. A representative sparsity threshold,  $s = 0.15$  was selected to calculate the thresholded binary functional

network (c), the module organization (d,  $Q = 0.47$ ,  $Z\text{-score} = 63.76$ ), and PC (e) and WMD (f). (g) Scatter plot showing node roles based on nodal PC and WMD .

**Figure S4**

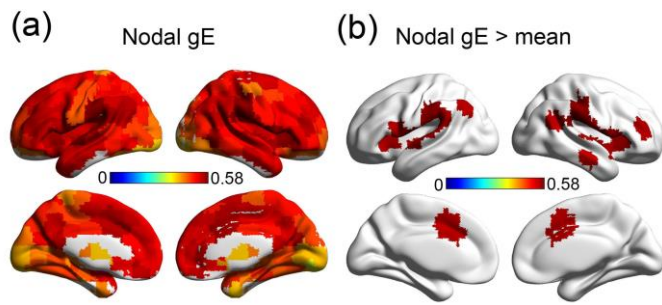

**Figure S4. Nodal gE of the averaged whole-brain healthy functional network ( $N = 144$ ).**



**Figure S5**

**Lesion hubs** (network metrics calculated using AUC in the sparsity thresholds range 0.13–0.47)

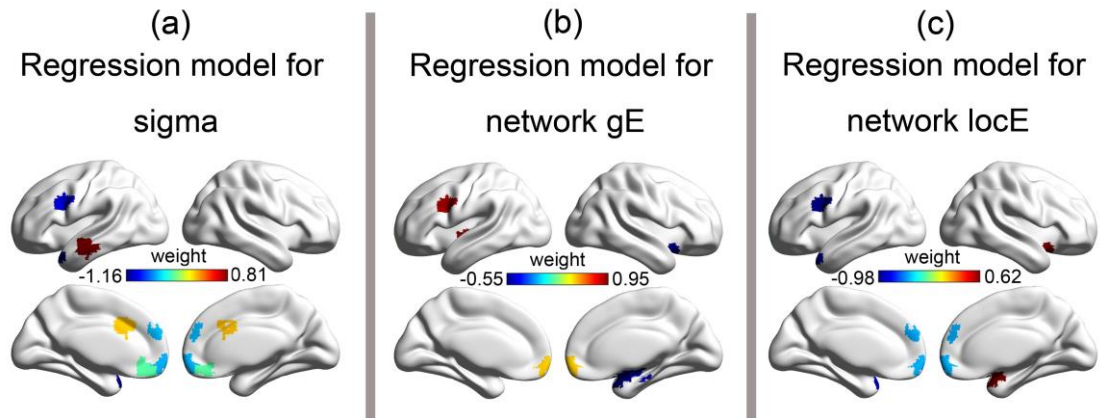

**Figure S5. Results of lesion hubs when network metrics were calculated using AUC in sparsity thresholds 0.13–0.47 (step 0.01).**

**Figure S6**

**Lesion hubs** (network metrics calculated from the censored data,  $s = 0.15$ , 95 patients)

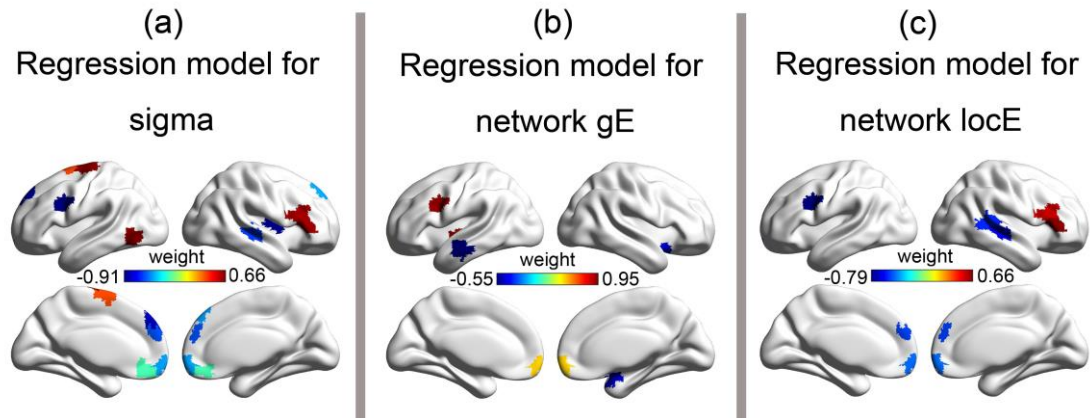

**Figure S6. Results of lesion hubs when network metrics were calculated based on censored data.** One subject who had fewer than 50 volumes after scrubbing was removed.

**Figure S7**

**Lesion hubs** (network metrics ( $s = 0.15$ ) and lesion patterns were calculated using Brainnetome Atlas)

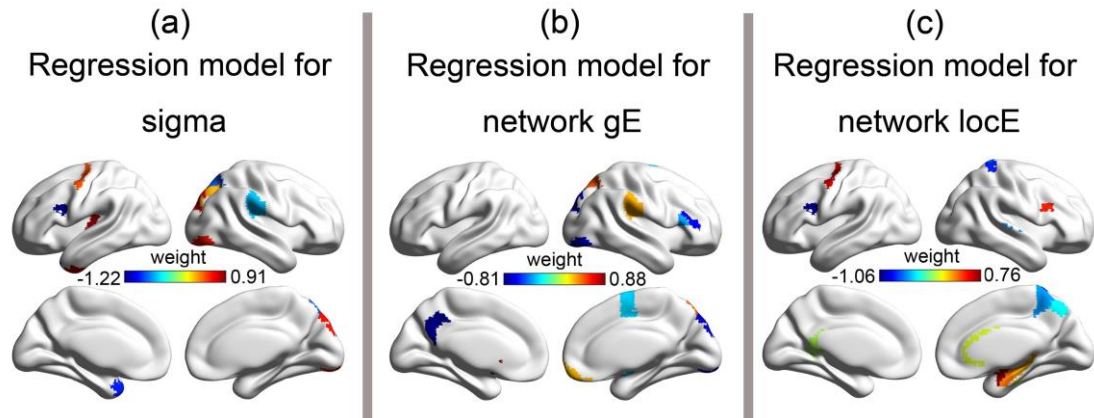

**Figure S7. Results of lesion hubs when lesion pattern and network metrics were calculated using the Brainnetome Atlas.**

**Figure S8**

**Lesion hubs** (network metrics ( $s = 0.01$ ) and lesion patterns were calculated using Craddock 1000 Atlas)

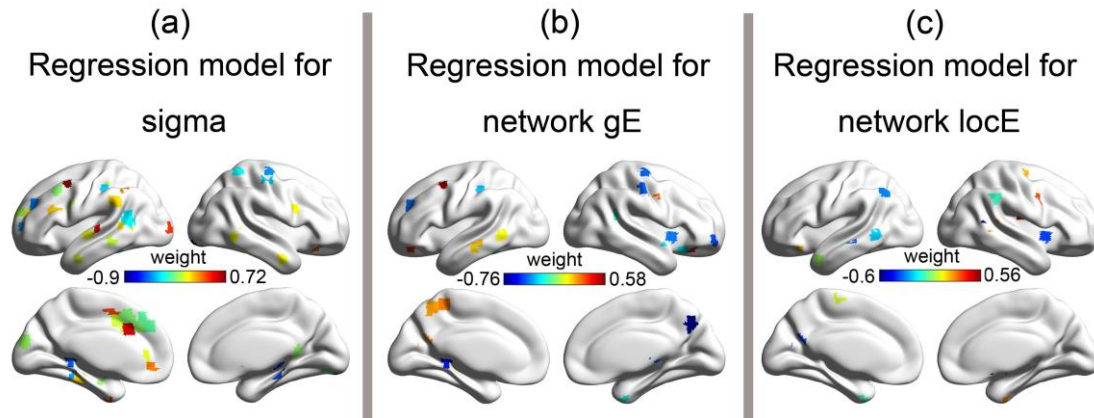

**Figure S8. Results of lesion hubs when lesion pattern and network metrics were calculated using the Craddock 1000 Atlas.** Note that because of the high non-independence among features when using the Craddock atlas with 1000 partitions, we focused on the lesion-hub detection results with the Craddock 200 atlas and the Brainnetome atlas.

**Figure S9**

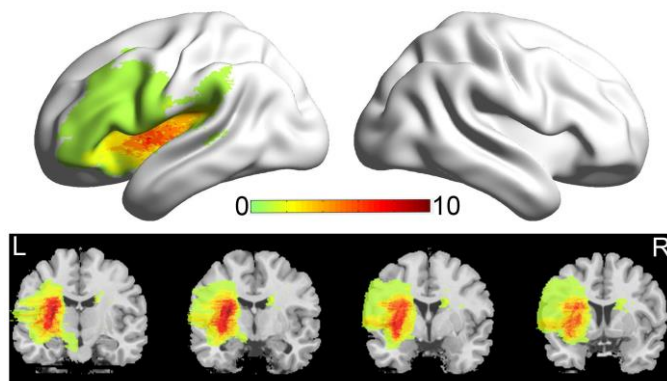

**Figure S9. The lesion overlap of 11 patients with focal brain lesion in the left insula (a lesion hub with “integration” lesion effect identified in lesion models).**

**Figure S10**

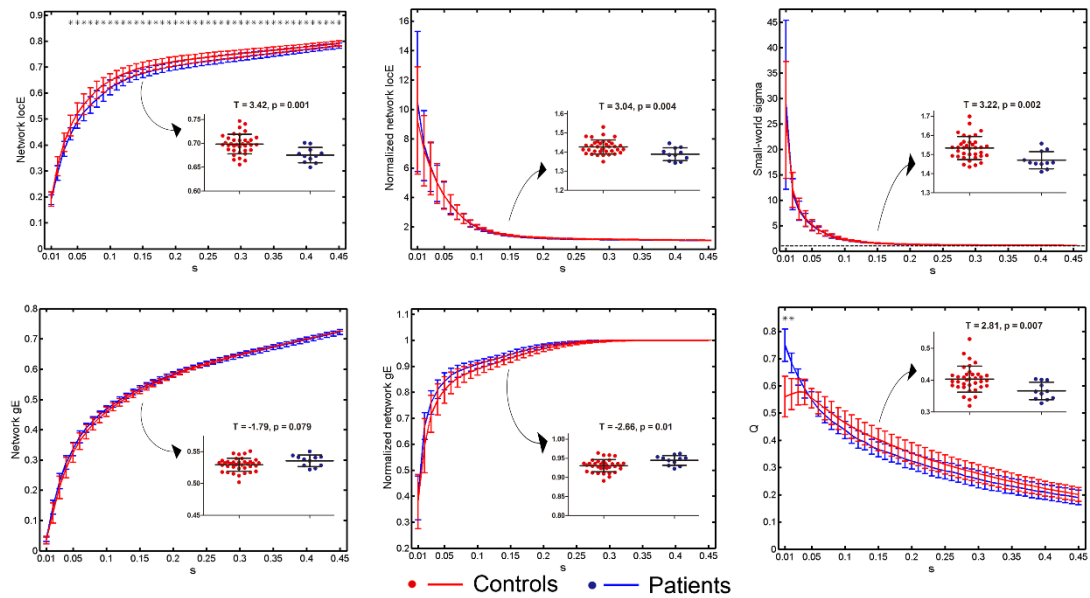

**Figure S10. The changing directions of network topology after focal brain lesion in the left insula.** Two-sample t-tests were performed between the topological properties of 11 patients and 36 controls that were matched on demographic variables (age, sex and education). The network locE and gE were normalized by 100 degree-matched random networks. The imbedded scatter plots show the distributions (mean and standard deviations of each group and the  $t$  and  $p$  values of Two-sample t-test) of network topological properties in  $s = 0.15$ .

**Figure S11**

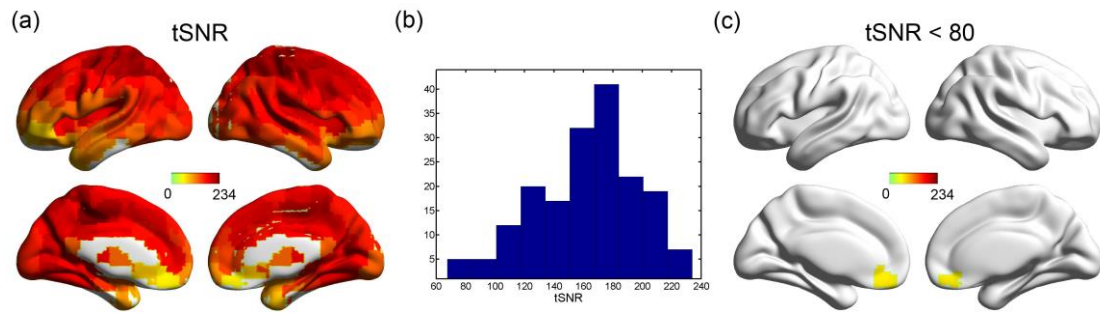

**Figure S11. The averaged BOLD tSNR (temporal signal noise ratio) of the 36 controls.** The tSNR for each node was estimated using the normalized data:

$tSNR = S_{mean} / \delta_{mean}$ , where the  $S_{mean}$  and  $\delta_{mean}$  are the mean intensity of the averaged BOLD signals and the standard deviation of the averaged BOLD signals of a node, respectively. (a) The mean tSNR averaged across the 36 controls. (b) The histogram of the averaged tSNR. (c) Most nodes satisfy the criteria for signal quality (mean tSNR > 80).

**Figure S12**

The linear and quadratic correlations between network topological properties ( $s = 0.15$ ) and age of the 96 patients

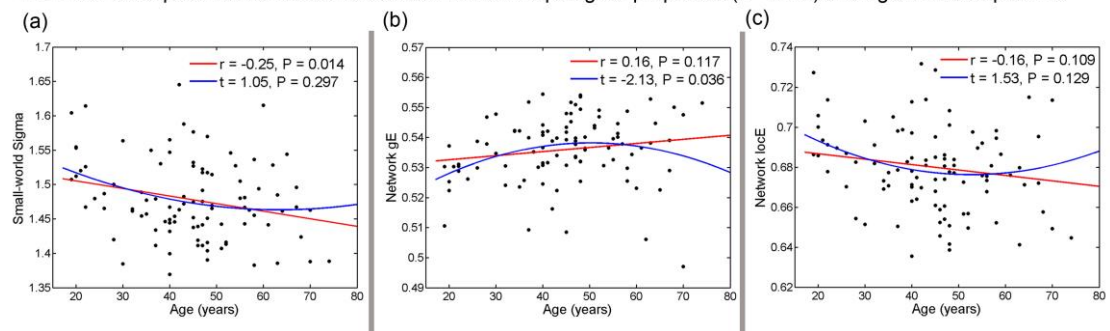

**Figure S12. The relationship between patient's age and the network topological properties ( $s = 0.15$ ).**



## Supplementary Tables

**Table S1. Detailed demographic and etiological characteristics of the 96 patients**

| Code | Sex    | Age<br>(year) | Education<br>(year) | Time since<br>injury<br>(months) | Cause of<br>disease | Lesion site                    |    |                                |    |            |
|------|--------|---------------|---------------------|----------------------------------|---------------------|--------------------------------|----|--------------------------------|----|------------|
|      |        |               |                     |                                  |                     | Left hemisphere                |    | Right hemisphere               |    | Brain stem |
|      |        |               |                     |                                  |                     | GM                             | WM | GM                             | WM |            |
| 4    | male   | 49            | 16                  | 6                                | hemorrhage          | F, P, T, Ins, BG               | *  | -                              | -  | -          |
| 7    | male   | 48            | 15                  | 4                                | infarction          | Lim, BG                        | *  | -                              | *  | -          |
| 8    | male   | 60            | 16                  | 6                                | hemorrhage          | F, P, T, Lim, Ins,<br>BG       | *  | F, Lim                         | *  | -          |
| 9    | male   | 43            | 19                  | 11                               | infarction          | -                              | -  | Lim, BG                        | *  | -          |
| 15   | male   | 22            | 12                  | 87                               | trauma              | P, O, Lim                      | *  | -                              | -  | -          |
| 16   | male   | 32            | 15                  | 9                                | hemorrhage          | F, O, T, Lim, Ins,<br>BG       | *  | -                              | -  | -          |
| 17   | female | 26            | 9                   | 10                               | atrophy             | F, P, O, Lim                   | *  | -                              | -  | -          |
| 18   | male   | 34            | 12                  | 10                               | hemorrhage          | F, P, T, Lim, Ins,<br>BG       | *  | -                              | -  | -          |
| 19   | male   | 42            | 14                  | 6                                | infarction          | F, P, T, Lim, Ins,<br>BG       | *  | -                              | -  | -          |
| 21   | male   | 63            | 12                  | 1                                | infarction          | -                              | -  | P, Ins, Lim, Thal              | *  | -          |
| 22   | male   | 49            | 12                  | 3                                | infarction          | F, P, T, Ins, Lim,<br>BG, Thal | *  | -                              | -  | -          |
| 25   | male   | 46            | 16                  | 2                                | infarction          | -                              | -  | O, T, BG, Thal                 | *  | -          |
| 26   | male   | 59            | 4                   | 10                               | gas poisoning       | Lim, BG                        | -  | F, Lim, BG                     | *  | -          |
| 27   | male   | 58            | 12                  | 6                                | unknown             | -                              | -  | -                              | -  | *          |
| 28   | male   | 32            | 12                  | 9                                | electric shock      | F, P, Lim, BG                  | *  | -                              | *  | -          |
| 29   | male   | 30            | 19                  | 3                                | infarction          | -                              | -  | F, P, T, Lim, Ins, BG,<br>Thal | *  | *          |
| 30   | male   | 41            | 15                  | 8                                | hemorrhage          | T, Ins, Lim, BG,<br>Thal       | *  | -                              | -  | -          |
| 33   | male   | 36            | 15                  | 10                               | hemorrhage          | F, Ins, BG, Thal               | *  | -                              | -  | -          |
| 34   | female | 64            | 12                  | 5                                | infarction          | F, Ins, BG, Thal               | *  | -                              | -  | -          |
| 35   | male   | 46            | 12                  | 6                                | infarction          | BG                             | *  | BG, Thal                       | *  | -          |
| 38   | male   | 40            | 12                  | 3                                | hemorrhage          | -                              | -  | F, T, Ins, Lim, Thal           | *  | -          |
| 42   | male   | 45            | 12                  | 3                                | hemorrhage          | F, Ins, BG                     | *  | F, P, T, Lim, BG               | *  | *          |
| 48   | female | 56            | 12                  | 6                                | hemorrhage          | -                              | -  | F, Ins. BG, Thal               | *  | *          |
| 56   | male   | 61            | 15                  | 15                               | hemorrhage          | F                              | *  | F, O, Ins, BG                  | *  | -          |
| 57   | male   | 51            | 9                   | 2                                | infarction          | F, P, T, Ins, Lim              | *  | -                              | -  | -          |
| 60   | male   | 45            | 16                  | 4                                | infarction          | T, Lim, Ins, BG,<br>Thal       | *  | -                              | -  | *          |

|     |        |    |    |    |            |                                   |   |                                   |   |   |
|-----|--------|----|----|----|------------|-----------------------------------|---|-----------------------------------|---|---|
| 62  | female | 56 | 12 | 6  | infarction | F, P, O, T, Ins, BG               | * | -                                 | - | - |
| 66  | male   | 35 | 16 | 2  | infarction | -                                 | - | F, Lim, BG, Ins,<br>Thal          | * | - |
| 67  | male   | 47 | 9  | 5  | infarction | -                                 | - | F, P, Ins, Lim, BG,<br>Thal       | * | * |
| 68  | male   | 40 | 16 | 6  | hemorrhage | F, P, T, Lim, Ins,<br>BG, Thal    | * | BG                                | * | * |
| 78  | male   | 40 | 8  | 2  | trauma     | T                                 | * | F, T                              | * | - |
| 79  | male   | 48 | 19 | 24 | hemorrhage | -                                 | * | P, F, O, T, Lim, Ins,<br>BG, Thal | * | * |
| 83  | male   | 54 | 16 | 4  | infarction | -                                 | - | F, P, O, Lim, Thal                | * | - |
| 85  | male   | 67 | 9  | 7  | infarction | F, P, T, Ins, Lim,<br>BG          | * | -                                 | - | - |
| 86  | male   | 67 | 12 | 5  | thrombosis | F, Lim, Ins, BG                   | * | F, Lim, BG                        | * | - |
| 87  | female | 45 | 9  | 30 | trauma     | BG, Thal                          | * | F, P, T, Lim, Ins, BG             | * | * |
| 88  | female | 70 | 16 | 3  | trauma     | F, P, T, Lim, Ins                 | * | F, BG, L, Ins                     | * | - |
| 89  | male   | 46 | 9  | 2  | infarction | F, P, T, Lim, BG                  | * | F, P, Lim, BG                     | * | - |
| 91  | male   | 65 | 9  | 8  | infarction | F, P, T, Lim, BG,<br>Thal         | * | F, P, O, T, Lim, Ins,<br>BG       | * | * |
| 97  | male   | 55 | 15 | 3  | infarction | F, Ins, BG                        | * | F, P, T, Lim, BG,<br>Thal         | * | * |
| 98  | male   | 62 | 12 | 10 | infarction | Ins, Lim, BG                      | * | F, P, Lim, BG                     | * | - |
| 101 | male   | 35 | 16 | 2  | infarction | F, P, T, Lim, BG                  | * | -                                 | - | - |
| 102 | male   | 28 | 16 | 3  | infarction | F, P, O, T, Ins, BG               | * | -                                 | - | - |
| 103 | female | 37 | 12 | 3  | infarction | F, P, O, T                        | * | -                                 | - | - |
| 104 | male   | 68 | 16 | 2  | infarction | F, P, O, T, BG,<br>Thal           | * | BG                                | * | - |
| 106 | female | 22 | 16 | 2  | hemorrhage | -                                 | * | F, P, Lim, BG                     | * | - |
| 109 | male   | 58 | 9  | 7  | infarction | F, P, Lim, Ins, BG                | * | BG                                | * | - |
| 111 | female | 51 | 8  | 5  | infarction | Ins, BG                           | * | F, P, O, T, Lim, Ins,<br>BG       | * | - |
| 112 | male   | 22 | 15 | 11 | trauma     | T, Ins, BG                        | * | -                                 | - | - |
| 114 | male   | 22 | 15 | 2  | trauma     | F, P, O, T, Lim                   | * | -                                 | - | - |
| 115 | male   | 20 | 9  | 2  | hemorrhage | F, O, T                           | * | F, T                              | * | - |
| 116 | male   | 56 | 15 | 5  | infarction | F, P, T, Lim, Thal                | * | -                                 | - | * |
| 117 | female | 45 | 15 | 2  | infarction | -                                 | - | F, P, O, T, Lim, Ins,<br>BG       | * | - |
| 118 | female | 40 | 12 | 6  | infarction | P, F, T, Ins, BG,<br>Thal         | * | -                                 | - | - |
| 122 | male   | 63 | 12 | 2  | infarction | F, P, O, T, Lim,<br>Ins, BG, Thal | * | -                                 | - | - |
| 123 | male   | 24 | 9  | 2  | trauma     | -                                 | - | P, F, Lim, Ins                    | * | - |
| 124 | male   | 52 | 12 | 3  | infarction | F, P, T, Lim, Ins,                | * | -                                 | * | - |



|     |        |    |    |   |            |                          |   |       |   |   |
|-----|--------|----|----|---|------------|--------------------------|---|-------|---|---|
| 214 | female | 19 | 12 | 2 | trauma     | P, O, T                  | * | -     | - | - |
| 217 | female | 34 | 15 | 2 | infarction | P, F, O, T, Ins, BG      | * | -     | - | - |
| 222 | female | 37 | 9  | 7 | trauma     | BG                       | - | -     | - | - |
| 226 | male   | 45 | 15 | 5 | infarction | F, P, T, Lim, Ins, BG    | * | -     | - | - |
| 231 | male   | 43 | 15 | 4 | infarction | F, Ins                   | - | -     | - | * |
| 304 | male   | 70 | 12 | 2 | infarction | F, P, O, T, Lim, Ins, BG | * | F, BG | * | - |
| 305 | male   | 47 | 12 | 4 | infarction | F, Ins, BG               | * | -     | - | - |

Note: LH: left hemisphere; RH: right hemisphere; F: frontal lobe; P: parietal lobe; O: occipital lobe; T: temporal lobe; Lim: limb lobe; Ins: insula; BG: basal ganglia; Thal: thalamus; \*: had lesion; -: no lesion.

**Table S2. Pearson's correlation coefficient between topological metrics ( $s = 0.15$ ) and relevant variables for all subjects**

|                        | Correlation coefficient/<br><i>P</i> value | Network<br>LocE | Network<br>gE    | Sigma            | Age           | Time after<br>lesion | Total<br>lesion<br>volume |
|------------------------|--------------------------------------------|-----------------|------------------|------------------|---------------|----------------------|---------------------------|
| Network                | <i>r</i>                                   |                 | <b>-0.765</b>    | <b>0.915</b>     | <b>-0.201</b> | 0.065                | <b>-0.329</b>             |
| LocE                   | <i>p</i>                                   |                 | <b>1.24E-19*</b> | <b>6.22E-39*</b> | <b>0.049</b>  | 0.529                | <b>0.001</b>              |
| Network                | <i>r</i>                                   |                 |                  | <b>-0.553</b>    | 0.118         | -0.018               | 0.015                     |
| gE                     | <i>p</i>                                   |                 |                  | <b>5.34E-9*</b>  | 0.253         | 0.862                | 0.888                     |
| Sigma                  | <i>r</i>                                   |                 |                  |                  | <b>-0.263</b> | 0.091                | <b>-0.31</b>              |
|                        | <i>p</i>                                   |                 |                  |                  | <b>0.001</b>  | 0.38                 | <b>0.002</b>              |
| Age                    | <i>r</i>                                   |                 |                  |                  |               | -0.187               | 0.113                     |
|                        | <i>p</i>                                   |                 |                  |                  |               | 0.069                | 0.273                     |
| Time after<br>lesion   | <i>r</i>                                   |                 |                  |                  |               |                      | -0.112                    |
|                        | <i>p</i>                                   |                 |                  |                  |               |                      | 0.276                     |
| Total lesion<br>volume | <i>r</i>                                   |                 |                  |                  |               |                      |                           |
|                        | <i>p</i>                                   |                 |                  |                  |               |                      |                           |

\*  $P < 0.05$

**Table S3. SVR prediction accuracies for the validation analyses**

| Topology     | Correlation coefficient/<br><i>P</i> value | AUC           | Scrubbing     | 76              | 77            | No GSR        | Brainnetome atlas  | Craddock 1000 atlas | Split-half reproducibility assessment |               |
|--------------|--------------------------------------------|---------------|---------------|-----------------|---------------|---------------|--------------------|---------------------|---------------------------------------|---------------|
|              |                                            |               |               | stroke patients | male patients |               |                    |                     | Sub group1                            | Sub group2    |
| Sigma        | <i>r</i>                                   | <b>0.29</b>   | <b>0.241</b>  | 0.049           | 0.106         | 0.093         | <b>0.449</b>       | <b>0.188</b>        | 0.185                                 | <b>0.425</b>  |
|              | <i>p</i>                                   | <b>0.013*</b> | <b>0.033*</b> | 0.194           | 0.117         | 0.136         | <b>&lt; 0.001*</b> | <b>0.045*</b>       | 0.091                                 | <b>0.013*</b> |
| Network gE   | <i>r</i>                                   | <b>0.287</b>  | <b>0.246</b>  | <b>0.222</b>    | <b>0.236</b>  | 0.168         | <b>0.454</b>       | <b>0.267</b>        | <b>0.383</b>                          | <b>0.402</b>  |
|              | <i>p</i>                                   | <b>0.012*</b> | <b>0.024*</b> | <b>0.034*</b>   | <b>0.03*</b>  | 0.067         | <b>&lt; 0.001*</b> | <b>0.016*</b>       | <b>0.006*</b>                         | <b>0.007*</b> |
| Network locE | <i>r</i>                                   | <b>0.317</b>  | <b>0.244</b>  | 0.199           | <b>0.278</b>  | <b>0.249</b>  | <b>0.387</b>       | <b>0.319</b>        | <b>0.348</b>                          | <b>0.392</b>  |
|              | <i>p</i>                                   | <b>0.007*</b> | <b>0.019*</b> | 0.051           | <b>0.02</b>   | <b>0.019*</b> | <b>0.002*</b>      | <b>0.005*</b>       | <b>0.018*</b>                         | <b>0.013*</b> |

\*  $P < 0.05$ , uncorrected, one-tailed; AUC: Area under the curve; GSR: global signal regression.

**Table S4. Participants' demographics of the 11 patients with focal brain lesions in the left insula and 36 matched controls.**

|                      | Patients              | Healthy controls      | p-value           |
|----------------------|-----------------------|-----------------------|-------------------|
| Sample size          | 11                    | 36                    |                   |
| Gender (male/female) | 10/1                  | 25/11                 | 0.16 <sup>1</sup> |
| Age (years)          | 44.64 ± 12.19 (21–64) | 48.28 ± 11.98 (26–72) | 0.38 <sup>2</sup> |
| Education (years)    | 13.73 ± 3.07 (6–16)   | 13.14 ± 4.16 (6–22)   | 0.67 <sup>2</sup> |

<sup>1</sup> Pearson Chi-square test; <sup>2</sup> Two-sample t-test.

## Supplementary Methods

### Network attributes calculation

#### (1&2) Local and global network efficiency

The local and global network efficiencies of a network measure the network's capability for information transmission at the local and global levels, respectively. The “global efficiency” is defined as the inverse of all shortest path lengths in a given network. The global efficiency is defined as follows:

$$E_{global} = \frac{1}{n} \sum_{i \in N} \frac{\sum_{j \in N, j \neq i} d_{ij}^{-1}}{n-1} \quad (1)$$

where  $d_{ij} = \sum_{a_{uv} \in g_{i \leftrightarrow j}} a_{uv}$ ,  $g_{i \leftrightarrow j}$  is the shortest path between  $i$  and  $j$ .  $a_{uv}$  is the connection status between  $u$  and  $v$ , i.e., 1 for presence of connection and 0 for absence.

The “local efficiency” of a node is defined as follows:

$$E_{loc} = \frac{1}{N} \sum_{i \in N} \frac{\sum_{j, h \in N, j \neq i} a_{ij} a_{ih} [d_{jh}(N_i)]^{-1}}{k_i (k_i - 1)} \quad (2)$$

where  $d_{jh}(N_i)$  is length of the shortest path between  $j$  and  $h$ , that contains only neighbors of  $i$ ,  $k_i$  is the degree of node  $i$ , i.e., number of links connected to  $i$ .

#### (3) Small-world

Small-world is a measure of a network that incorporates the two abovementioned efficiency metrics. In this study, small-worldness was calculated based on the ratios of the scaled local efficiency ( $E_{loc}/E_{loc-rand}$ ) and scaled global efficiency ( $E_{glob}/E_{glob-rand}$ ) between the real brain functional networks and 100 degree-matched random networks:

$$Sigma = \frac{E_{loc}/E_{loc-rand}}{E_{glob}/E_{glob-rand}} \quad (3)$$

Typically, if a network has a higher local efficiency than its random counterparts ( $E_{loc}/E_{loc-rand} > 1$ ) and an approximately equivalent global efficiency ( $E_{glob}/E_{glob-rand} \approx 1$ ), i.e.,  $sigma > 1$ , the network is said to demonstrate “small-worldness”.



## Calculation of nodal centrality measures in the healthy functional network

We calculated the nodal attributes on a healthy dataset including 144 healthy college students reported in our previous study<sup>1</sup>. All 144 subjects were recruited from Beijing Normal University. They were all right-handed, with no history of neurological or psychiatric disorders. All participants provided written informed consent. Scanning was performed on a 3.0 T Siemens Tim Trio scanner at the Beijing Normal University Imaging Centre for Brain Research. High-resolution three-dimensional T1-weighted magnetization-prepared rapid gradient-echo images were acquired for anatomic reference (repetition time (TR) = 2530 ms, echo time (TE) = 3.39 ms, inversion time (TI) = 1100 ms, flip angle (FA) = 7°, 144 sagittal no-gap slices, voxel size =  $1.33 \times 1 \times 1 \text{ mm}^3$ , field of view (FOV) =  $256 \times 256 \text{ mm}$ ). Resting-state images were obtained using a gradient-echo echo-planar sequence sensitive to blood oxygenation level-dependent contrast (TR = 2000 ms, TE = 30 ms; FA = 90°, 33 axial slices acquired interleaved with a 0.7 mm gap, voxel size =  $3.125 \times 3.125 \times 4.2 \text{ mm}^3$ , FOV =  $200 \times 200 \text{ mm}$ , 200 volumes). Participants were instructed to stay awake and keep their eyes closed during the functional runs.

The preprocessing procedures included slice timing, realignment, registration, detrending, filtering (0.01–0.1 Hz), and nuisance covariance regression (Friston 24 head motion, global signal, cerebrospinal fluid, and white matter). The network construction was the same as that of patient data. The functional connectivity matrix for each youth participant was first  $z$ -transformed using Fisher  $z$ -transformation and then averaged across subjects. The mean functional connectivity matrix was used for graph theory analysis. Three nodal attributes were calculated: global efficiency (gE), participant coefficient (PC) and within-module degree (WMD).

The calculation formulas of nodal gE were the same as those described above.

Next, we provided detailed descriptions of nodal PC and WMD. The two nodal attributes relied on the module organization of the functional network. Thus, we first defined the modules by performing modularity analysis. Here we used Newman's

modularity algorithm based on a spectral optimization algorithm. For a given network, the modularity  $Q$  is:

$$Q = \frac{1}{l} \sum_{i,j \in N} \left( a_{ij} - \frac{k_i k_j}{l} \right) \delta_{m_i m_j} \quad (4)$$

where  $m_i$  is the module containing node  $i$ , and  $\delta_{m_i m_j} = 1$  if  $m_i = m_j$ , and 0 otherwise.

To validate the robustness of the partition, we calculated the modular assignment of each node in sparsity range 0.05–0.2, with 0.01 increment.

Four modules were consistently defined (Fig. S3 a and b): visual network, default mode network, frontal-parietal network and somatosensory network. Here, we chose a representative sparsity threshold ( $s = 0.15$ ) to get the modular assignment. Based on this module organization, the PC of a node  $i$  is defined as follows:

$$PC(i) = 1 - \sum_{m \in M} \left( \frac{k_i(m)}{k_i} \right)^2 \quad (5)$$

where  $M$  is the number of modules,  $k_i(m)$  is the number of links between node  $i$  and all nodes in module  $m$  and  $k_i$  is the total degree of node  $i$ . The  $PC(i)$  tends towards 1 if node  $i$  has a homogeneous connection distribution with all the modules and towards 0 if it does not have any inter-module connections. PC measures the ability of a node to maintain communication between its own module and the other modules. A high PC value for a given node usually means the node has many inter-module connections.

The WMD score is a z-scored measure of the number of intramodule connections to each node. The WMD of node  $i$  is defined as follows:

$$WMD(i) = \frac{k_i - \bar{k}_{is}}{\delta_{is}} \quad (6)$$

where  $\bar{k}_{is}$  is the average degree of all nodes in module  $s$  and  $\delta_{is}$  is the standard deviation of the degree of all nodes in module  $s$ .

### Validation analyses

A series of validation analyses were performed to examine the robustness of the

main results. Details are described below for each of these validations:

1) *The effect of network sparsity threshold.* We used the AUC to calculate network metrics across the 0.13–0.47 (step 0.01) sparsity range and SVR analyses were then reanalyzed;

2) *Head motion,* we further performed a “scrubbing” procedure on the preprocessed images. For each participant, preprocessed 4D data were first censored based on a criterion of framewise displacement > 0.5 mm (but with at least 50 time points left). The network attribute were calculated using these censored volumes and SVR analyses were then re-conducted;

3) *The effect of global signal removal.* Global signal removal is a controversial preprocessing step<sup>2</sup>. It was performed in the main analysis, but we also reanalyzed our data without regressing out the global signal;

4) *The effect of brain parcellation.* We repeated the whole analyses using another brain parcellation – Brainnetome Atlas<sup>3</sup> (246 nodes) – to investigate the sensitivity of prediction to the choice of parcellation scheme. We chose this atlas because its parcellation was done on the basis of structural connectivity and had comparable number of regions with the Craddock 200 atlas. We also considered a third Craddock 1000 atlas<sup>4</sup> which contained much finer parcellations. For Craddock 1000 atlas, after excluding the nodes in cerebellum and brainstem, 789 cerebrum nodes were used to generate a finer lesion pattern and to construct functional network. We then re-performed the SVR analysis in sparsity threshold,  $s = 0.01$ , an arbitrary threshold to ensure sparse and fully-connected networks;

5) *The effects of lesion type and handedness.* To maximize lesion coverage, we included multiple types of patients in the main analysis. To ensure that our results were not contaminated by etiology and handedness, we re-performed the SVR prediction and lesion hub detection on only the 76 right-handed (handedness assessed using the Chinese adaptation of Edinburgh inventory<sup>5</sup>) stroke patients (13 females; age: mean  $\pm$  SD = 47.013  $\pm$  11.218; range, 20–74 years);

6) *The effect of gender.* The gender effect on small-world brain networks have been showed by previous studies<sup>6,7</sup>. The ratio of male/female of the patient group is

unbalanced, 19/77. To test the extent to which our results are affected by sex, we re-performed the SVR prediction and lesion hub detection using only the male patients (age: mean  $\pm$  SD = 47.01  $\pm$  11.22; range, 20–74 years);

7) *Validating the feature signs using single-nodal lesion patients.* To test whether positive or negative features imply increased or reduced topological values, 11 patients with focal lesion in the left insula and 36 matched controls (Table S4) were adopted to investigate the changing directions of network topological properties after focal lesion. For controls, the imaging data collection and preprocessing procedures were the same as those for patients. Six network topological metrics, the network locE and gE, the scaled network locE and gE, the small-worldness sigma and the modularity  $Q^8$  were calculated in a wide sparsity range (0.01–0.45, step 0.01). For each metric, Two-sample t-tests were performed and corrected by FDR correction ( $P < 0.05$ ) for multiple comparisons.

- 1 Xu, Y., Lin, Q., Han, Z., He, Y. & Bi, Y. Intrinsic functional network architecture of human semantic processing: Modules and hubs. *Neuroimage* **132**, 542-555 (2016).
- 2 Murphy, K. & Fox, M. D. Towards a consensus regarding global signal regression for resting state functional connectivity MRI. *Neuroimage*(2016).
- 3 Fan, L. *et al.* The Human Brainnetome Atlas: A New Brain Atlas Based on Connectional Architecture. *Cereb Cortex* **26**, 3508-3526 (2016).
- 4 Craddock, R. C., James, G. A., Holtzheimer, P. E., 3rd, Hu, X. P. & Mayberg, H. S. A whole brain fMRI atlas generated via spatially constrained spectral clustering. *Hum Brain Mapp* **33**, 1914-1928 (2012).
- 5 Oldfield, R. C. The assessment and analysis of handedness: the Edinburgh inventory. *Neuropsychologia* **9**, 97-113 (1971).
- 6 Yan, C. G. *et al.* Sex- and Brain Size-Related Small-World Structural Cortical Networks in Young Adults: A DTI Tractography Study. *Cerebral Cortex* **21**, 449-458 (2011).
- 7 Tian, L. X., Wang, J. H., Yan, C. G. & He, Y. Hemisphere- and gender-related differences in small-world brain networks: A resting-state functional MRI study. *Neuroimage* **54**, 191-202 (2011).
- 8 Newman, M. E. Modularity and community structure in networks. *Proceedings of the National Academy of Sciences of the United States of America* **103**, 8577-8582 (2006).
